# Supplementary material
Source: MDPI journal article supplement (https://www.mdpi.com/2073-4395/11/2/304)
Supplement: s1 [file s1]

## SUPPLEMENTARY MATERIAL

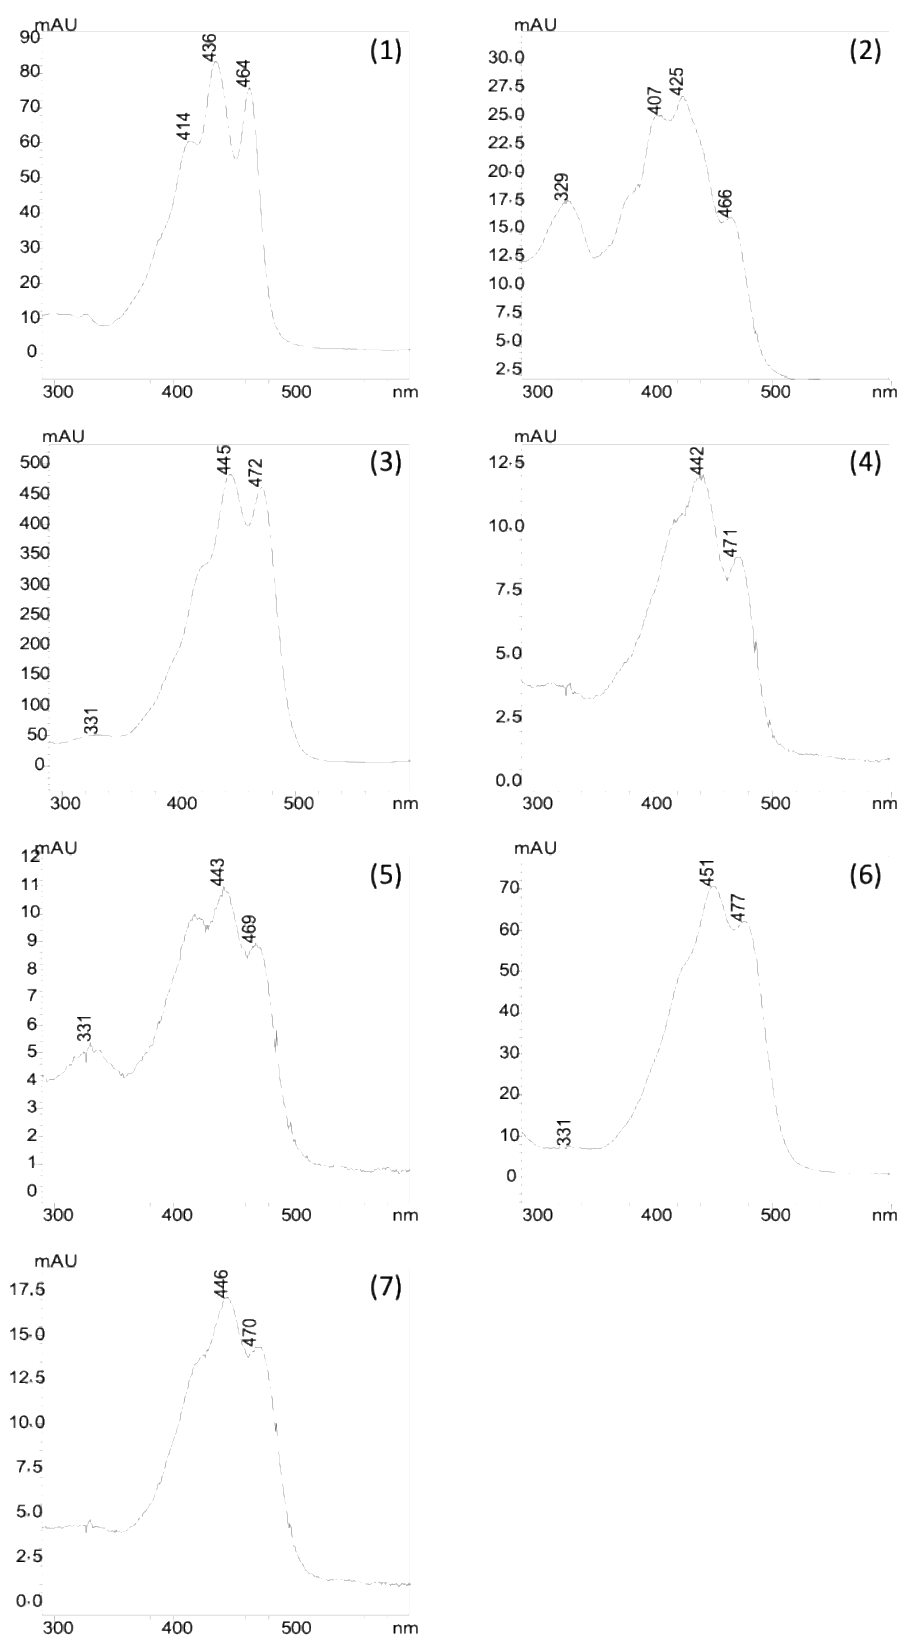

**Figure S1.** PDA spectra of identified carotenoid peaks of carrot sprouts. (1) all-trans neoxanthin, (2) 13 or 13'-cis lutein, (3) all-trans lutein, (4) 9-cis lutein, (5) 15-cis  $\beta$ -carotene, (6) all-trans  $\beta$ -carotene, and (7) 9-cis  $\beta$ -carotene.
